# Supplementary material for: Endohedral metallofullerenes in self-assembled monolayers
Source: Royal Society of Chemistry journal article supplement (doi:10.1039/b915170b), 2009-11-11

## Endohedral Metallofullerenes in Self-Assembled Monolayers

### Supporting Information

Maria del Carmen Gimenez-Lopez,<sup>a</sup> Jules Gardener,<sup>b</sup> Agnieszka Iwasiewicz-  
Wabnig,<sup>b</sup> Kyriakos Porfyrakis,<sup>b</sup> Claire Balmer,<sup>b</sup> Geraldine Dantelle,<sup>b†</sup> Adam Shaw,<sup>b</sup>  
Maria Hadjipanayi,<sup>c</sup> Alison Crossley,<sup>b</sup> Neil R. Champness,<sup>a</sup> Martin R. Castell,<sup>b</sup> G.  
Andrew D. Briggs,<sup>b</sup> Andrei N. Khlobystov<sup>a</sup>

<sup>a</sup> *School of Chemistry, University of Nottingham NG7 2RD, UK*

<sup>b</sup> *Department of Materials, University of Oxford, Oxford OX1 3PH, UK*

<sup>c</sup> *Department of Physics, University of Oxford, Parks Road, Oxford, OX1 3PU, UK*

<sup>†</sup> *Present address: Laboratoire de Photonique Quantique et Moléculaire - ENS*

*Cachan - 61 Avenue du Président Wilson - F-94 235 Cachan Cedex, France*

#### Table of contents

- S1. Synthesis, <sup>1</sup>H and <sup>13</sup>C NMR spectra of **3**
- S2. MALDI-TOF mass spectrum of the crude mixture of **1**
- S3. Heteronuclear Multiple Quantum Correlation (HMQC) spectrum of **1**
- S4. <sup>1</sup>H and <sup>13</sup>C NMR spectra of **4**
- S5. MALDI-TOF mass spectrum of **4**
- S6. HPLC chromatogram of **4**
- S7. Reactivities of C<sub>70</sub> and C<sub>78</sub> in the reaction of 1,3-dipolar cycloaddition.

### S1. Synthesis of 4-(liponyloxy)benzaldehyde (3)

In a slenck flask, ( $\pm$ )- $\alpha$ -Lipoic acid (412.6 mg, 2 mol) and 4-hydroxybenzaldehyde (280.4 g, 2.25 mol) were dissolved in dry-THF (20 mL). The solution was stirred and cooled in an ice bath to 0°C while a clear solution of 4-dimethylaminopyridine (195.5 g, 1.6 mol) and dicyclohexylcarbodiimide (464.2 g, 2.25 mol) in minimum quantity of dry-THF was added drop wise. After a further 30 min at 0°C the ice bath is removed and the reaction mixture is stirred for 2 days at room temperature. At the end the dicyclohexylurea that precipitated was removed by filtration and the solvent was removed *in vacuo*. The residue was purified by column chromatography (SiO<sub>2</sub>; dichloromethane) to afford yellow oil in a yield of 49 % (300 mg). <sup>1</sup>H-NMR {270 Mz, CDCl<sub>3</sub>, 300 K}  $\delta_{\text{H}}$  9.98 (s, 1H, CHO), 7.90, 7.25 (d,  $J=4.2$  Hz, 2H each, ArH), 3.64–3.54 (m, 1H, –CH), 3.21–3.06 (m, 2H, –CH<sub>2</sub>), 2.60 (t,  $J=7.2$  Hz, 2H, –CH<sub>2</sub>–alkyl chain), 2.53–2.41 (m, 1H, –CH<sub>2</sub>), 1.97–1.85 (m, 1H, –CH), 1.82–1.70 (m, 4H, –CH<sub>2</sub>–alkyl chain), 1.62–1.51 (m, 2H, –CH<sub>2</sub>–alkyl chain). <sup>13</sup>C-NMR {270 Mz, CDCl<sub>3</sub>, 300 K}  $\delta_{\text{C}}$  191.00, 171.34, 155.46, 134.04, 131.30, 122.43, 56.35, 40.34, 38.61, 34.66, 34.22, 28.65, 24.59. IR(KBr) cm<sup>-1</sup>: 3425, 3120, 1676, 1076. ESI-MS (m/z): 310.07 (M<sup>+</sup>).

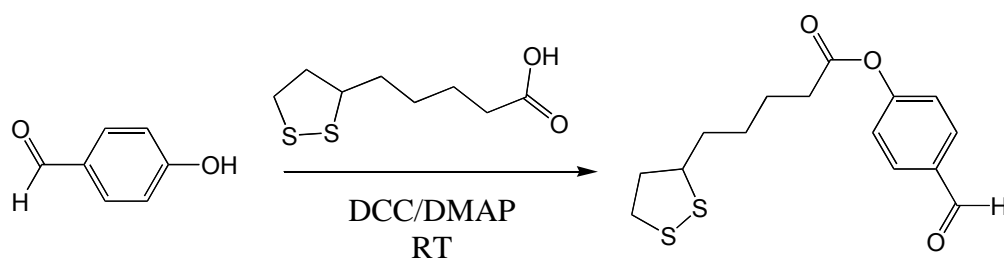

Esterification scheme of Lipoic acid with 4-Hydroxybenzaldehyde.

$^1\text{H}$  NMR and  $^{13}\text{C}$  NMR {270 Mz,  $\text{CDCl}_3$ , 300 K} spectra of **3**.

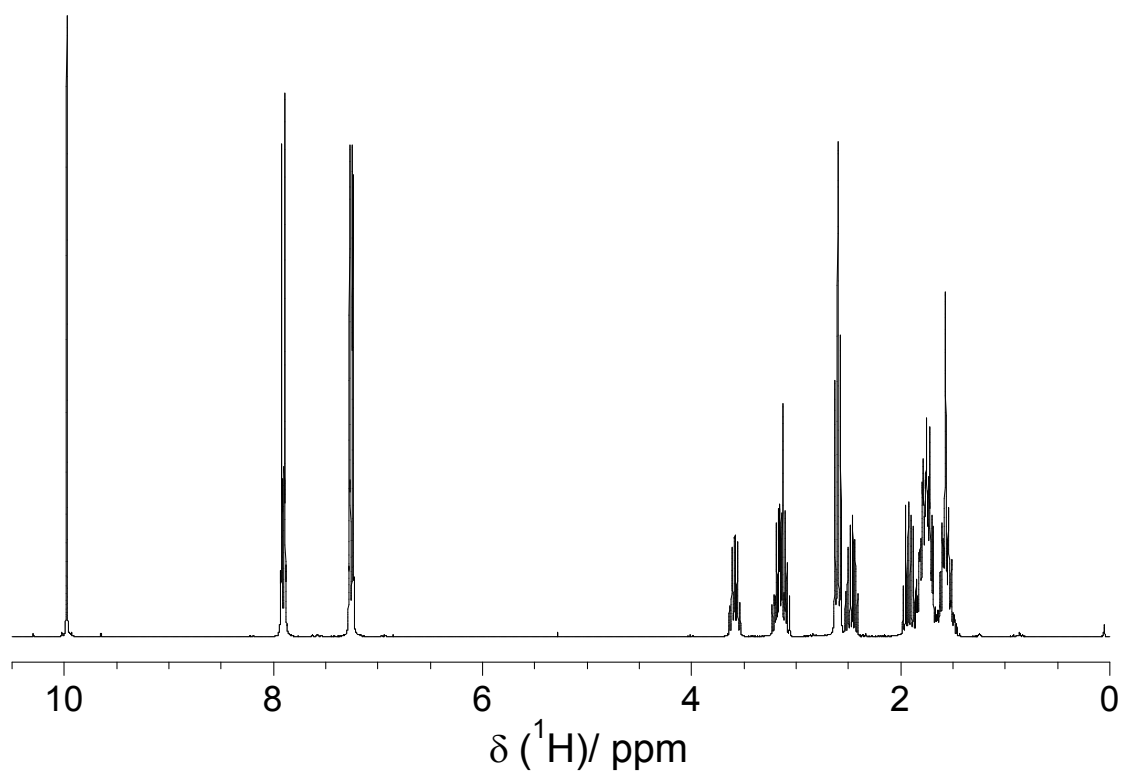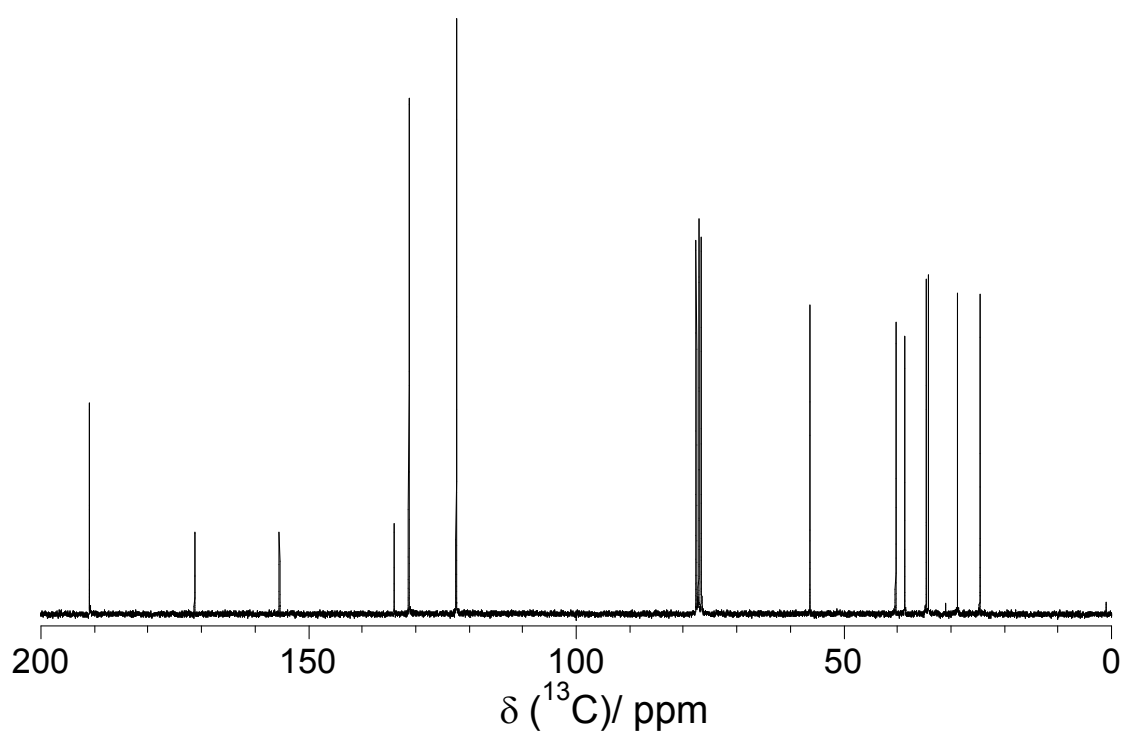

**S2.** MALDI-TOF mass spectrum of the crude mixture of the cycloaddition of azomethine ylides to  $\text{Sc}_3\text{N@C}_{80}$  after 270 min using a DCTB matrix and negative ionization.

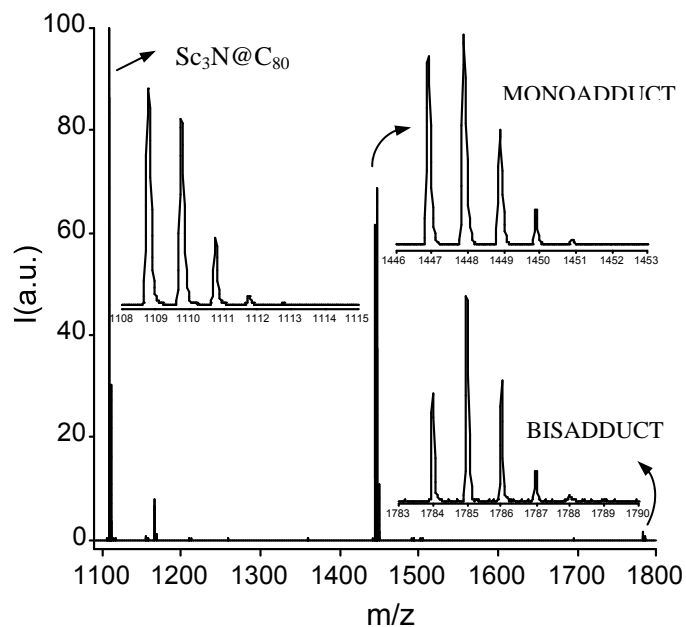

**S3.** HMQC spectrum {500 Mz,  $\text{CDCl}_3:\text{CS}_2$  (1:6), 300 K} of *N*-methyl-2-(4-(liponyloxy)benzyl)- $\text{Sc}_3\text{N@C}_{80}$  (**1**)

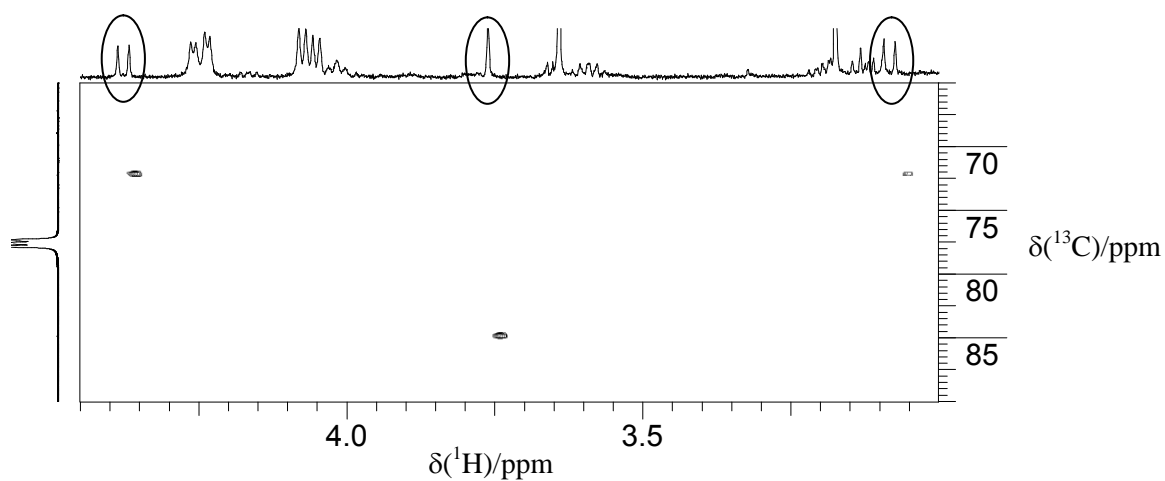

**S4.**  $^1\text{H}$  and  $^{13}\text{C}$  NMR {400 Mz,  $\text{CDCl}_3:\text{CS}_2$  (1:6), 300 K} spectra of the *N*-methyl-2-(4-(liponyloxy)benzyl)-[6,6]- $\text{C}_{60}$  (**4**)

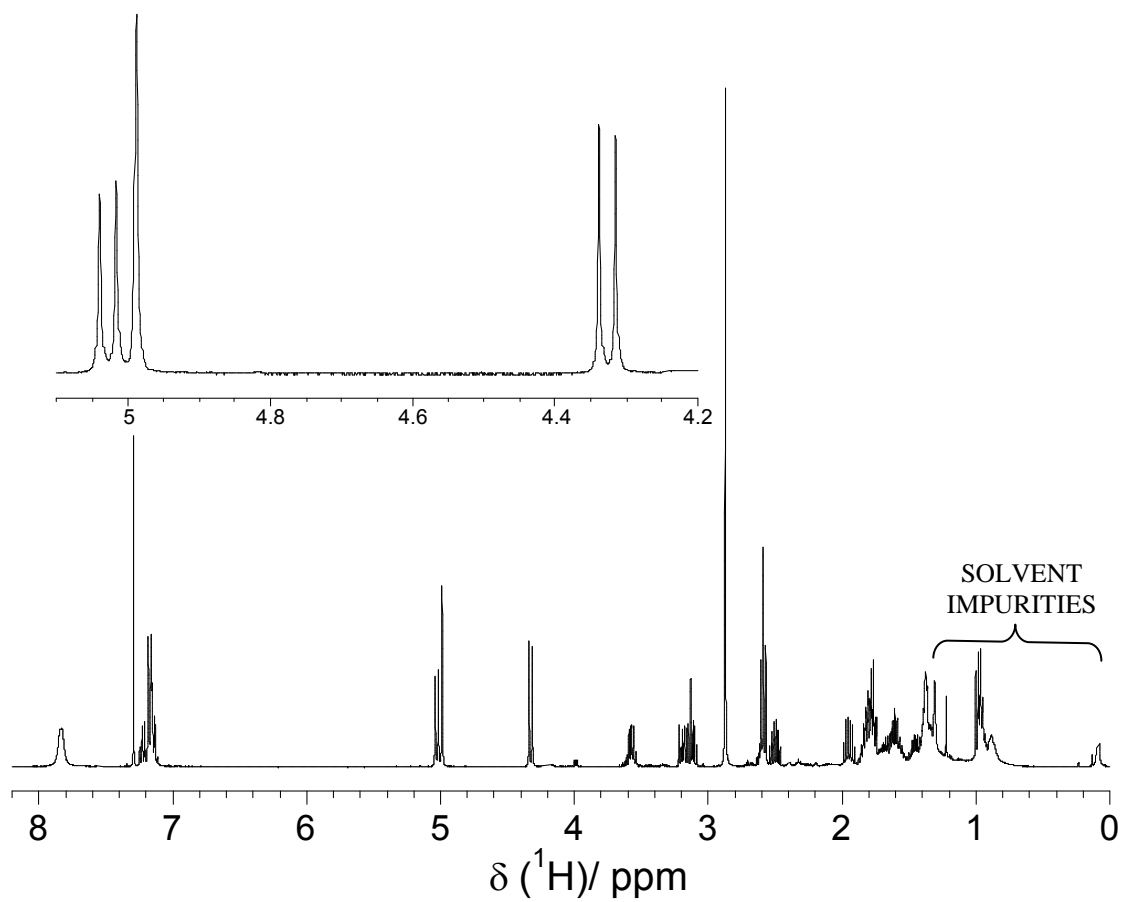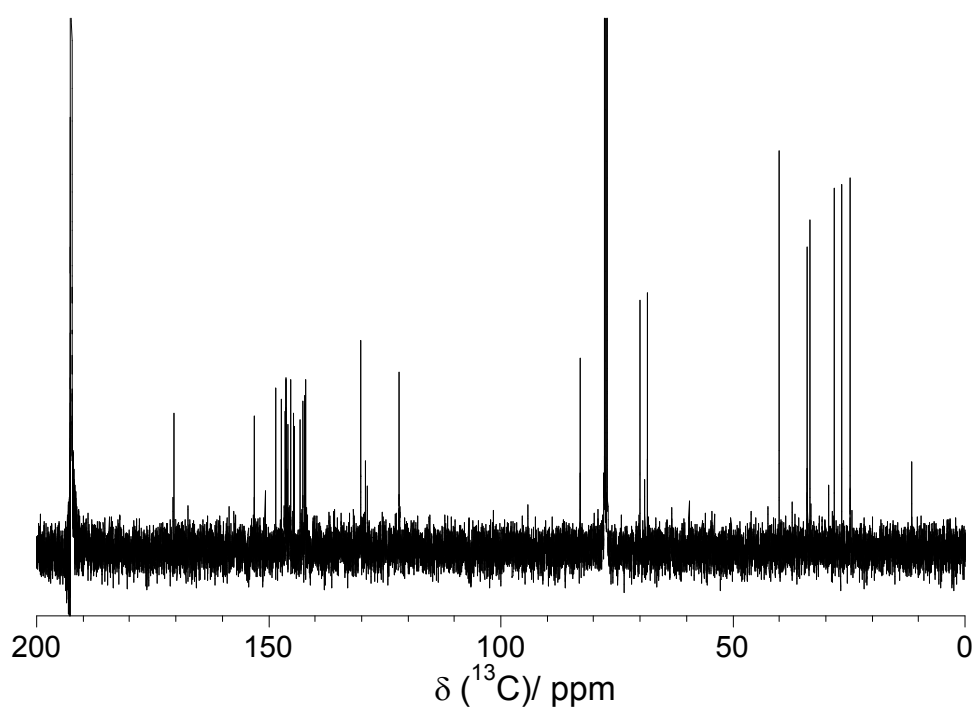

**S5.** MALDI-TOF mass spectrum of pure *N*-methyl-2-(4-(liponyloxy)benzyl)-[6,6]-**C**<sub>60</sub> fulleropyrrolidine (**4**) using a DCTB matrix and negative ionization.

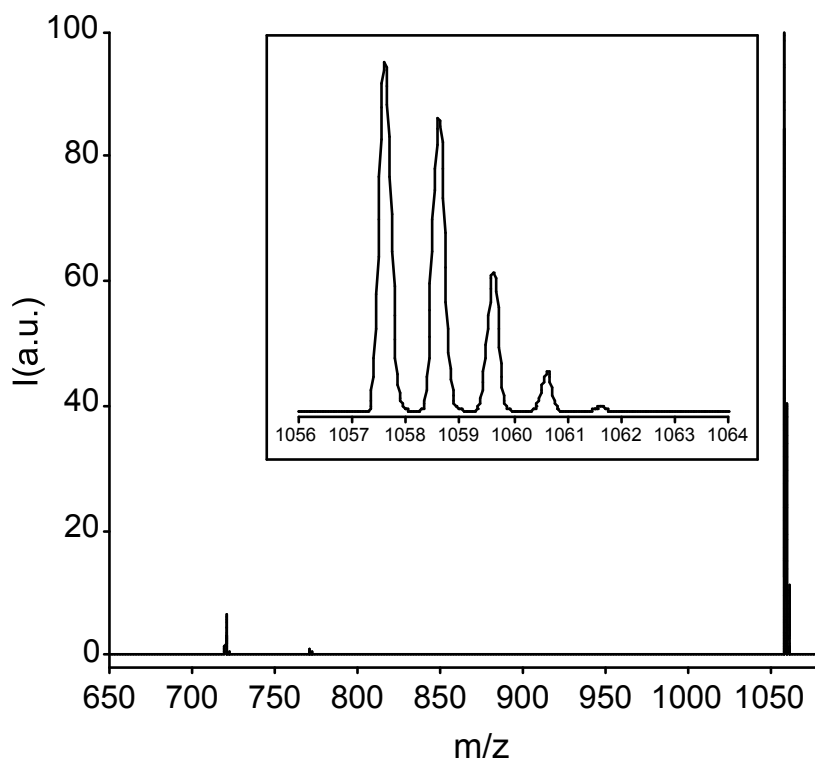

**S6.** HPLC chromatogram of *N*-methyl-2-(4-(liponyloxy)benzyl)-[6,6]-**C**<sub>60</sub> (**4**) using 3% ethylacetate in toluene as eluent and SiO<sub>2</sub> FORTIS HILIC (5 $\mu$ ) (250 mm x 21 mm) column.

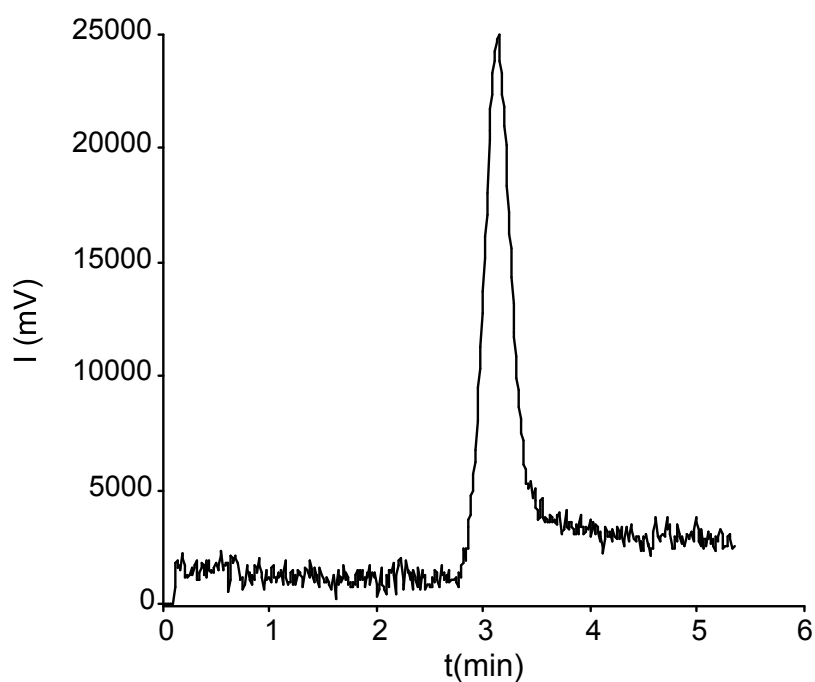

**S7.** (a) Evolution of mono- (◆), bis- (■), tris- (●) and tetra-functionalised (▲) fullerenes in the reaction of 1,3-dipolar cycloaddition of dithiolane aldehyde **3** with (a) C<sub>70</sub> and (b) C<sub>78</sub> as a function of time.  $I_{rel}$  is a relative conversion rate calculated as  $I_{rel}(\%) = [I_{adduct} / (\sum I_{adduct(i)} + I_{C60})] \cdot 100$  measured by MALDI-TOF mass spectrometry. The appearance of peak shoulders (b) may be related to the presence of minor isomers of C<sub>78</sub>.

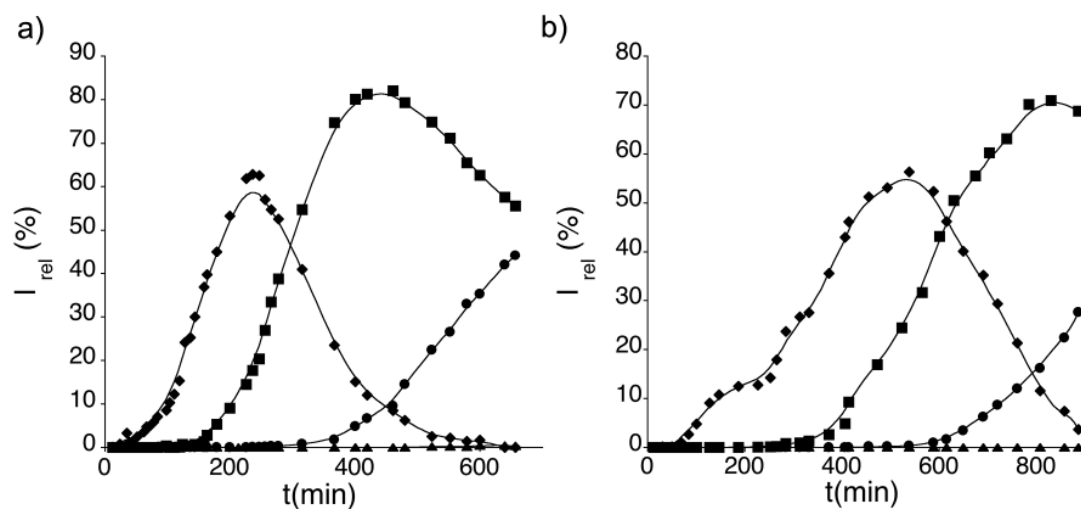

Supplement: b915170b.pdf [file b915170b.pdf]
